# Supplementary material
Source: PubMed Central journal article supplement (PMC2527883)
Supplement: 0802518105_0802518105SI.pdf [file 0802518105_0802518105SI.pdf]

# Supporting Information

Yang *et al.* 10.1073/pnas.0802518105

```
Jemalong A17      GATTGAATAAAATTTACAATTATTCAATAAAATCAACTGTGGTGGGAATCCCTGACAGGATCG
F83005.5         GATTGAATAAAATTTACAATTATTCAATAAAATCAACTGTGGTGGGAATCCCTGACAG-----
*****

Jemalong A17      ACTATGTGCAGACTGCTGCATTATTTACTACTTAGTCAAAGTCTTTGAACAGAG
F83005.5         -----CAAGTCTTTGAACAGAG
*****

Jemalong A17      CACTTCCCAACTCCATAGATCTCTTCCTTTCTTTTCCTTAGTGTTCGAAACCACAAATC
F83005.5         CACTTCCCAACTCCATAGATCTCTTCCTTTCTTTTCCTTAGTGTTCGAAACCACAAATC
*****

Jemalong A17      ATTCATCC
F83005.5         ATTCATCC
*****
```

Fig. S1. Alignment of 5' UTR region of the resistant and susceptible alleles in Jemalong A17 and F83005.5, respectively.

```

A17-tv2      ATATGGAAGGTGTTGCTAGTTGTGGCTGATTGGTGAATTATAGTTTATGAAAGTGGATTG
A17-tv1      ATATGGAAGGTGTTGCTAGTTGTGGCTGATTGGTGAATTATAGTTTATGAAAGTGGATTG
A17-tv3      ATATGGAAGGTGTTGCTAGTTGTGGCTGATTGGTGAATTATAGTTTATGAAAGTGGATTG
*****

A17-tv2      CAGATTTTATGCTTACATTGGTGGCTACTAATGCTCTTATTGCTGAGGCATGAGGTCCA
A17-tv1      CAGATTTTATGCTTACATTGGTGGCTACTAATGCTCTTATTGCTGAGGCATGAGGTCCA
A17-tv3      CAGATTTTATGCTTACATTGGTGGCTACTAATGCTCTTATTGCTGAGGCATGAGGTCCA
*****

A17-tv2      GGGAAAGTTAAGTTGACTTAGATCTGGTTTCACAGAAATCCAACCTTGAGTTTGACTG--
A17-tv1      GGGAAAGTTAAGTTGACTTAGATCTGGTTTCACAGAAATCCAACCTTGAGTTTGACTG--
A17-tv3      GGGAAAGTTAAGTTGACTTAGATCTGGTTTCACAGAAATCCAACCTTGAGTTTGACTGGT
*****

A17-tv2      -----
A17-tv1      -----
A17-tv3      AAGCTCGGATCCTAATGCTTTAATGGGAGCAAGATAAGGAACTGATCAACAATTTAAT

A17-tv2      ----TATACTTCTACAGAAAATTGTCAGATGGAATCATTTCATGTTTTAAATGAAGGCA
A17-tv1      -----AAAATTGTCAGATGGAATCATTTCATGTTTTAAATGAAGGCA
A17-tv3      ACTAGTATACTTCTACAGAAAATTGTCAGATGGAATCATTTCATGTTTTAAATGAAGGCA
*****

A17-tv2      TTGAAATGCAGCCAATCTTGGAAAATTCAGTATGCTTCAAGAAGAATTCATTGTCTCCAA
A17-tv1      TTGAAATGCAGCCAATCTTGGAAAATTCAGTATGCTTCAAGAAGAATTCATTGTCTCCAA
A17-tv3      TTGAAATGCAGCCAATCTTGGAAAATTCAGTATGCTTCAAGAAGAATTCATTGTCTCCAA
*****

A17-tv2      ACCAATAAACATAAACTGTGAGACTTCTAATGTTAGTTAAGTGGATTTGTTATTCAAG
A17-tv1      ACCAATAAACATAAACTGTGAGACTTCTAATGTTAGTTAAGTGGATTTGTTATTCAAG
A17-tv3      ACCAATAAACATAAACTGTGAGACTTCTAATGTTAGTTAAGTGGATTTGTTATTCAAG
*****

A17-tv2      AGCTATGTGAACCTTCATGCCACAACAGGGTGCGCAAGGGAGTGAATATGTACATCTTGTA
A17-tv1      AGCTATGTGAACCTTCATGCCACAACAGGGTGCGCAAGGGAGTGAATATGTACATCTTGTA
A17-tv3      AGCTATGTGAACCTTCATGCCACAACAGGGTGCGCAAGGGAGTGAATATGTACATCTTGTA
*****

A17-tv2      GTCGAGGAAAGGCACCTTCAATATCGTTAAGTTTGGATATATACATATAAACACCCCAT
A17-tv1      GTCGAGGAAAGGCACCTTCAATATCGTTAAGTTTGGATATATACATATAAACACCCCAT
A17-tv3      GTCGAGGAAAGGCACCTTCAATATCGTTAAGTTTGGATATATACATATAAACACCCCAT
*****

A17-tv2      TGAATGATCCTTTAATTGCTTCAACAAATGAATGTGATATTTTCATCCCCCTCTTAAGCT
A17-tv1      TGAATGATCCTTTAATTGCTTCAACAAATGAATGTGATATTTTCATCCCCCTCTTAAGCT
A17-tv3      TGAATGATCCTTTAATTGCTTCAACAAATGAATGTGATATTTTCATCCCCCTCTTAAGCT
*****

A17-tv2      TGTCATCTGCAAAGAACTTATAATTTGGTTCAGAGGAAAAGCCTTACTCAAATGAGCAA
A17-tv1      TGTCATCTGCAAAGAACTTATAATTTGGTTCAGAGGAAAAGCCTTACTCAAATGAGCAA
A17-tv3      TGTCATCTGCAAAGAACTTATAATTTGGTTCAGAGGAAAAGCCTTACTCAAATGAGCAA
*****

A17-tv2      GAGAGCCTCCTAGTTGTGATCTTTTTTTTTTATTTGAAGGAAAGGAAGGAGGAGGAGTG
A17-tv1      GAGAGCCTCCTAGTTGTGATCTTTTTTTTTTATTTGAAGGAAAGGAAGGAGGAGGAGTG
A17-tv3      GAGAGCCTCCTAGTTGTGATCTTTTTTTTTTATTTGAAGGAAAGGAAGGAGGAGGAGTG
*****

A17-tv2      ATCTTTATAATGTAACAAAGTACAAAAAAATGTAATAATGTTGTTGAGTTATCGAA
A17-tv1      ATCTTTATAATGTAACAAAGTACAAAAAAATGTAATAATGTTGTTGAGTTATCGAA
A17-tv3      ATCTTTATAATGTAACAAAGTACAAAAAAATGTAATAATGTTGTTGAGTTATCGAA
*****

A17-tv2      AGTGATGCTATTTCTATGACC
A17-tv1      AGTGATGCTATTTCTATGACC
A17-tv3      AGTGATGCTATTTCTATGACC
*****

```

**Fig. S2.** Alignment of transcript variants (tv) from the 3' UTR region of the *RCT1* allele in Jemalong A17. tv1 = the regular transcript with an 80-bp intron spliced out; tv2 = the transcript with only 67 bp of the 80-bp intron spliced out; tv3 = the transcript with retention of the 80-bp intron.





JEMALONG A17  
F83005.5 ACTCTGAA**T**ACTCTCATTCTAT**C**GGATGTTAATGATTGACAAGTTGGAAGAGGACTTG  
ACTCTGAA**A**ACTCTCATTCTAT**C**TGGATGTTAATGATTGACAAGTTGGAAGAGGACTTG  
\*\*\*\*\*

JEMALONG A17  
F83005.5 GAACAAATGGAATCTTTAACCCCTGATGCAAATA**T**ACTGGTATAACAAAAGTTCCC  
GAACAAATGGAATCTTTAACCCCTGATGCAAATA**C**ACTGGTATAACAAAAGTTCCC  
\*\*\*\*\*

JEMALONG A17  
F83005.5 TTTTCAT**T**AGTAAGGTCAAAAAGCATTGGATTTATTTCTCTGTGTGGATATGAAGGATTC  
TTTTCAT**G**AGTAAGGTCAAAAAGCATTGGATTTATTTCTCTGTGTGGATATGAAGGATTC  
\*\*\*\*\*

JEMALONG A17  
F83005.5 TCACGTGATGTGTTTCCTTCTATCATT**G**GTCTTGGATGTCACCAATAATCTGTCACCC  
TCACGTGATGTGTTTCCTTCTATCATT**T**GTCTTGGATGTCACCAATAATCTGTCACCC  
\*\*\*\*\*

JEMALONG A17  
F83005.5 GCTTTTCAAACAGCTTCTCACATGTCATCCCTTGTGTCTTTAGAGGCATCAACTGTATT  
GCTTTTCAAACAGCTTCTCACATGTCATCCCTTGTGTCTTTAGAGGCATCAACTGTATT  
\*\*\*\*\*

JEMALONG A17  
F83005.5 TTCCACGATCTATCATCTATTTCCATTGTCCTTCCAAAGCTTCAAAGCCTTTGGCTGAC**A**  
TTCCACGATCTATCATCTATTTCCATTGTCCTTCCAAAGCTTCAAAGCCTTTGGCTGAC**G**  
\*\*\*\*\*

JEMALONG A17  
F83005.5 TGTGGATCAGA**A**CTTCAACTATCACAAGATGCAACACGAATTGTGAATGCTTTAAGTGTA  
TGTGGATCAGA**A**CTTCAACTATCACAAGATGCAACACGAATTGTGAATGCTTTAAGTGTA  
\*\*\*\*\*

JEMALONG A17  
F83005.5 GCAAGTTCTATGGAATTGGAATCAACTGCAACTAC**A**TACAAGTACCAGATGTGAATTCA  
GCAAGTTCTATGGAATTGGAATCAACTGCAACTAC**G**TACAAGTACCAGATGTGAATTCA  
\*\*\*\*\*

JEMALONG A17  
F83005.5 TTAATTGAATGTCGCAGTCAAGTGAAAGTTTCAACCACTCCAAATCCATGAAATCTCTT  
TTAATTGAATGTCGCAGTCAAGTGAAAGTTTCAACCACTCCAAATCCATGAAATCTCTT  
\*\*\*\*\*

JEMALONG A17  
F83005.5 TTATTTCAAATGGGAATGA**A**CTCCCTAATCACCAATATTCTGAAAGAGAGGATCTTACAG  
TTATTTCAAATGGGAATGA**A**CTCCCTAATCACCAATATTCTGAAAGAGAGGATCTTACAG  
\*\*\*\*\*

JEMALONG A17  
F83005.5 AATTTGACTATCGATGAGCATGGTCGTTTTTCACTCCCTTGTGATAATTACCCGATTTGG  
AATTTGACTATCGATGAGCATGGTCGTTTTTCACTCCCTTGTGATAATTACCCGATTTGG  
\*\*\*\*\*

JEMALONG A17  
F83005.5 TTAGCTTTCAATTCAGAAGTTCTTCTGTAATTTTGAAGTCCCTCAAGTGAAGGACGT  
TTAGCTTTCAATTCAGAAGTTCTTCTGTAATTTTGAAGTCCCTCAAGTGAAGGACGT  
\*\*\*\*\*

JEMALONG A17  
F83005.5 AGCTTGAAGACAATAATGTGCATTGTCTATTCTTCAAGCCATA**C**GACATAACATCAGAT  
AGCTTGAAGACAATAATGTGCATTGTCTATTCTTCAAGCCATA**T**GACATAACATCAGAT  
\*\*\*\*\*

JEMALONG A17  
F83005.5 GGCCTTGAAATGTGTTAGTGATAAATCACACAAAGACCACCATTCAACTCTATAAGAGA  
GGCCTTGAAATGTGTTAGTGATAAATCACACAAAGACCACCATTCAACTCTATAAGAGA  
\*\*\*\*\*

JEMALONG A17  
F83005.5 GA**A**GCATTATCCTCCT**T**GAAAATGAGGAGTGGCAGAGAGTTGT**A**CAAATATGGAACCT  
GAG**G**CATTATCCTCCT**A**GAAAATGAGGAGTGGCAGAGAGTTGT**A**TCAAATATGGAACCT  
\*\* \*\*\*\*\*

JEMALONG A17  
F83005.5 GGTGACA**A**GGTGGAGATTGTTGT**C**GTTTTTGGGAACAGTTTCATTGTGATGAAGACAGCA  
GGTGACA**A**GGTGGAGATTGTTGT**T**GTTTTTGGGAACAGTTTCATTGTGATGAAGACAGCA  
\*\*\*\*\*

JEMALONG A17  
F83005.5 GTTTATCTCATATATGATGAACCAGTCGTCGAAATATTGGAGCAATGTCATACACCAGAT  
GTTTATCTCATATATGATGAACCAGTCGTCGAAATATTGGAGCAATGTCATACACCAGAT  
\*\*\*\*\*

Fig. S3. Continued.

JEMALONG A17 AAGAATGTTCTTG**T**TGATATCGGTGATGAAAATGAATGTGCTGCCATGAGGATCTCTCGC  
 F83005.5 AAGAATGTTCTTG**C**TGATATCGGTGATGAAAATGAATGTGCTGCCATGAGGATCTCTCGC  
 \*\*\*\*\*

JEMALONG A17 CAAGTAGAGCCTACAGATGATTTTGAACAAAAACAGAAAAGAAGAAAAAT**CGA**CTGA  
 F83005.5 CAAGTAGAGCCTACAGATGATTTTGAACAAAAACAGAAAAGAAGAAAAAT**TGA**TTGA  
 \*\*\*\*\* \*\* \*\*

Fig. S3. Continued.

```

F83005.5-tv1      ATATGGAAGGTGTTGCTAGTTGTGGCTGATTGGTGAATTATAGTTTATGACAGTGGATTG
F83005.5-tv2      ATATGGAAGGTGTTGCTAGTTGTGGCTGATTGGTGAATTATAGTTTATGACAGTGGATTG
*****

F83005.5-tv1      CAGATTTTATGCTTACATTGGTGGTTACTAATGCTCTTATTGCTGAGGCATGAGGTGCCA
F83005.5-tv2      CAGATTTTATGCTTACATTGGTGGTTACTAATGCTCTTATTGCTGAGGCATGAGGTGCCA
*****

F83005.5-tv1      GGGAAAGTTAAGTTGACTTAGATCTTGGTTTCACAGAAATCCAACCTTGAGTTTGACTG--
F83005.5-tv2      GGGAAAGTTAAGTTGACTTAGATCTTGGTTTCACAGAAATCCAACCTTGAGTTTGACTGGT
*****

F83005.5-tv1      -----
F83005.5-tv2      AAGCTCGGATCCTAATGCTTTAATGGGAGTAAGATAAGGAAACTGATCAACAAATTTAAT

F83005.5-tv1      -----AAAATTGTCAGATGGAAATCATTCATGTTTTAAATGAAGGCA
F83005.5-tv2      ACTAGTATACTTCTACAGAAAATTGTCAGATGGAAATCATTCATGTTTTAAATGAAGGCA
*****

F83005.5-tv1      TTGAAATGCAGCCAATCTTGGAAATTTTCAGTATGCTTCAAGAAGAATTCATTGTCTCCAA
F83005.5-tv2      TTGAAATGCAGCCAATCTTGGAAATTTTCAGTATGCTTCAAGAAGAATTCATTGTCTCCAA
*****

F83005.5-tv1      ACCAATAAACATAAACTGTGAGACTTCTAATGTTTGGTTTAAGTGGATTTGTTATTCAAG
F83005.5-tv2      ACCAATAAACATAAACTGTGAGACTTCTAATGTTTGGTTTAAGTGGATTTGTTATTCAAG
*****

F83005.5-tv1      AGCTATGTGAACTTCATGCCACAACAGGGTGCGCAAGGGAGTGAATATGTACATCTTGTA
F83005.5-tv2      AGCTATGTGAACTTCATGCCACAACAGGGTGCGCAAGGGAGTGAATATGTACATCTTGTA
*****

F83005.5-tv1      GTCGAGGAAAGGCACCTTCAATGTAACACCCCTACTAGAAATTACCTAGGATATCTAGCA
F83005.5-tv2      GTCGAGGAAAGGCACCTTCAATGTAACACCCCTACTAGAAATTACCTAGGATATCTAGCA
*****

F83005.5-tv1      TGAGTGTTAACTTGGCAATGGATACATTTAAAATTACTACAATAAAAATTTCTCTGAAT
F83005.5-tv2      TGAGTGTTAACTTGGCAATGGATACATTTAAAATTACTACAATAAAAATTTCTCTGAAT
*****

F83005.5-tv1      AAGATACAAAAATTTCTCGTC
F83005.5-tv2      AAGATACAAAAATTTCTCGTC
*****

```

**Fig. S4.** Sequence polymorphisms between resistant and susceptible alleles in Jemalong A17 and F83005.5, respectively. The 299-bp 3' end of *RCT1* cDNAs and the 119-bp 3' end of the *rct1* cDNAs are not shared and thus not included in the alignment.
